# Supplementary material for: A plasma miRNA signature for lung cancer early detection
Source: PubMed Central journal article supplement (PMC5762367; doi:10.18632/oncotarget.22950), 2017-12-05
Supplement: oncotarget-08-111902-s001.pdf [file oncotarget-08-111902-s001.pdf]

## A plasma miRNA signature for lung cancer early detection

### SUPPLEMENTARY MATERIAL

**Supplementary Table 1: Fifty-four miRNAs whose changes are associated with lung cancer defined by next-generation deep sequencing, and tested in plasma samples in this study\***

|             |             |             |            |             |             |             |
|-------------|-------------|-------------|------------|-------------|-------------|-------------|
| mir-584-5p  | mir-422a    | mir-409-5p  | mir-326    | mir-324-3p  | mir-122-5p  | mir-103a-3p |
| mir-30a-5p  | mir-1285    | mir-1254    | mir-574-5p | mir-146b-5p | mir-34b-3p  | mir-27a-3p  |
| mir-27b-3p  | mir-10a-5p  | mir-429     | mir-222-3p | mir-125a-5p | mir-125b-5p | mir-124-3p  |
| mir-106a-3p | mir-92a-3p  | mir-29c     | mir-24a-3p | mir-486-5p  | mir-4753    | mir-425-5p  |
| mir-221-3p  | mir-301a-3p | mir-200b-5p | mir-183-5p | mir-141     | mir-204     | mir-25      |
| mir-195-5p  | mir-152-3p  | mir-148a    | mir-148b   | mir-19a-3p  | mir-193a-3p | mir-205-5p  |
| mir-21      | mir-4251    | mir-193b-3p | mir-19b-3p | mir-210-3p  | mir-145     | mir-126-3p  |
| mir-155     | mir-17-5p   | mir-223-3p  | mir-375    | miR135a-5p  |             |             |

\*, the tested miRNAs of lung cancer not only comprise these previously published lung cancer-related miRNAs, including the ones discovered by The Cancer Genome Atlas (TCGA), but also miRNAs that have not been identified as associated with lung cancer.
